# Supplementary material for: COVID-19 Vaccination in Health Care Workers in Italy: A Literature Review and a Report from a Comprehensive Cancer Center
Source: MDPI journal article supplement (doi:10.3390/vaccines10050734), 2022-05-07

**Table S1: Timing of blood collection(s) and serological test(s)**

| S. No. | Blood collection                                                                                                                             | Serological test(s)                                                                                                                                                                                                                                                                                                                                                                                                                                                                                                    |
|--------|----------------------------------------------------------------------------------------------------------------------------------------------|------------------------------------------------------------------------------------------------------------------------------------------------------------------------------------------------------------------------------------------------------------------------------------------------------------------------------------------------------------------------------------------------------------------------------------------------------------------------------------------------------------------------|
| 7      | T1: 123 days on average<br>(13-253 days) after second dose<br>T2: 92 days on average<br>(11-183 days) after the first serology<br>evaluation | Roche Elecsys kit [cut-off positivity $\geq 0.8$ U/mL]                                                                                                                                                                                                                                                                                                                                                                                                                                                                 |
| 8      | T0: before first dose<br>T1: 28-30 days after the first dose<br>regardless of receipt the second dose                                        | SARS-CoV-2 IgG II Quant assay (Abbott, Abbott Park, Illinois, USA) [cut-off positivity $\geq 50$ AU/mL]                                                                                                                                                                                                                                                                                                                                                                                                                |
| 9      | T1: 14-60 days after the second dose                                                                                                         | Roche Elecsys kit on Cobas C8000 [cut-off positivity $\geq 0.8$ BAU/mL]                                                                                                                                                                                                                                                                                                                                                                                                                                                |
| 10     | T0: before first dose<br>T1: 3 weeks after the first dose<br>T2: 2 weeks after the second dose                                               | Liaison SARS-CoV-2 S1/S2 IgG (DiaSorin, Saluggia, VC, Italy) [cut-off positivity $> 15$ AU/mL]                                                                                                                                                                                                                                                                                                                                                                                                                         |
| 11     | T1-Cov+: 21 days after the first dose<br>T1-Cov-: 21 days after the second dose                                                              | ND [cut-off positivity $> 1$ U/ml]                                                                                                                                                                                                                                                                                                                                                                                                                                                                                     |
| 12     | T0: before first dose<br>T1: 2 weeks after the first dose<br>T2: 2 weeks after the second dose                                               | Liaison SARS-CoV-2 S1/S2 IgG (DiaSorin, Saluggia, VC, Italy) [cut-off positivity $> 15$ AU/mL]                                                                                                                                                                                                                                                                                                                                                                                                                         |
| 13     | T1: 30 days after the second dose<br>T2: 60 days after the second dose<br>T3: 90 days after the second dose                                  | Liaison SARS-CoV-2 trimeric-S IgG (DiaSorin, Saluggia, VC, Italy) [cut-off positivity $\geq 33.8$ BAU/L]                                                                                                                                                                                                                                                                                                                                                                                                               |
| 14     | T0: pre-vaccination sample *<br>T1: 12 days after the first dose<br>T2: 28 days after the first dose<br>T3: 6 months after the first dose    | (A) Liaison SARS-CoV-2 trimeric-S IgG on XL analyzer (DiaSorin, Saluggia, VC, Italy) [cut-off positivity $\geq 33.8$ kBAU/L]<br>(B) SARS-CoV-2 S-RBD IgG on Maglumi [cut-off positivity $\geq 4.33$ kBAU/L]<br>(C) sVNT Nab on Maglumi 2000 plus (Snibe Diagnostics, Shenzhen, China) [cut-off positivity $\geq 0.3$ mg/L]                                                                                                                                                                                             |
| 15     | T6: 190 days on average<br>(183-202 days) after first dose                                                                                   | Roche Elecsys Anti-SARS-CoV-2 S [cut-off positivity $\geq 0.8$ U/mL(*)]                                                                                                                                                                                                                                                                                                                                                                                                                                                |
| 16     | T1: 2 weeks after the second dose<br>T2: 3 months after the second dose                                                                      | Roche Elecsys Anti-SARS-CoV-2 S on Cobas 411 [cut-off positivity $\geq 0.8$ IU/mL]                                                                                                                                                                                                                                                                                                                                                                                                                                     |
| 17     | T1: 1 month after the second dose<br>T2: 4 months after the second dose                                                                      | SARS-CoV-2 S-RBD IgG on Maglumi 800 analyzer (Snibe Diagnostic, Shenzhen, China) [cut-off positivity $\geq 1.1$ AU/mL]                                                                                                                                                                                                                                                                                                                                                                                                 |
| 18     | T0: pre-vaccination sample *<br>T1: 12 days after the first dose<br>T2: 28 days after the first dose                                         | (A) Liaison SARS-CoV-2 trimeric-S IgG on XL analyzer (DiaSorin, Saluggia, VC, Italy) [cut-off positivity $\geq 33.8$ kBAU/L]<br>(B) Roche Elecsys Anti-SARS-CoV-2 S on Cobas C-8000 [cut-off positivity $\geq 0.8$ IU/mL]<br>(C) SARS-CoV-2 S-RBD IgG on Maglumi 2000 plus [cut-off positivity $\geq 4.33$ kBAU/L]<br>(D) NAb on Maglumi 2000 plus (Snibe Diagnostics, Shenzhen, China) [cut-off positivity $\geq 0.3$ mg/L]<br>(E) NAb on iFlash-2019-nCov Neutralizing antibody [cut-off positivity $\geq 10$ kAU/L] |

|    |                                                                                                                                                                                                           |                                                                                                                                                                                                                                                |
|----|-----------------------------------------------------------------------------------------------------------------------------------------------------------------------------------------------------------|------------------------------------------------------------------------------------------------------------------------------------------------------------------------------------------------------------------------------------------------|
| 19 | T0: before first dose<br>T1: 21 days after the first dose<br>T2: 51 days after the first dose<br>T3: 151 days after the first dose                                                                        | SARS-CoV-2 S-RBD IgG on Maglumi analyzer (Snibe Diagnostic, Shenzhen, China) [cut-off positivity $\geq 1$ AU/mL]                                                                                                                               |
| 20 | T1: 14 days after the second dose                                                                                                                                                                         | Liaison SARS-CoV-2 trimeric-S IgG (DiaSorin, Saluggia, VC, Italy) [cut-off positivity $\geq 33.8$ BAU/mL]                                                                                                                                      |
| 21 | T0: before first dose<br>T1: 7 days after the first dose<br>T2: 21 days after the first dose<br>T3: 28 days after the first dose<br>T4: 90 days after the first dose                                      | (A) Roche Elecsys Anti-SARS-CoV-2 and Elecsys Anti-SARS-CoV-2 S method on Cobas e801 [cut-off positivity $\geq 0.8$ IU/mL]<br>(B) SARS-CoV-2 trimeric-S IgG by Liaison XL (DiaSorin, Saluggia, VC, Italy) [cut-off positivity $\geq 13$ AU ml] |
| 22 | T0: before first dose<br>T1: 15 days after the first dose<br>T2: 30 days after the first dose<br>T3: 45 days after the first dose<br>T4: 60 days after the first dose<br>T5: 90 days after the first dose | SARS-CoV-2 antibodies by ADVIA Centaur® XPT Immunoassay System (Siemens Healthcare GmbH, Munich, Germany) [cut-off positivity $\geq 1.0$ Index]                                                                                                |
| 23 | T0: before first dose<br>T1: 21 days after the first dose<br>T2: 50 days after the first dose                                                                                                             | (A) SARS-CoV-2 trimeric-S IgG by Liaison XL (DiaSorin, Saluggia, VC, Italy) [cut-off positivity $\geq 33.8$ BAU/mL]<br>(B) ACCESS SARS-CoV-2 IgG II by Access 2 (Beckman Coulter) [cut-off positivity $\geq 10$ AU/mL]                         |
| 24 | T0: before first dose<br>T1: 21 days after the first dose                                                                                                                                                 | OSR: Roche Elecsys Anti-SARS-CoV-2 S [cut-off positivity $\geq 0.8$ IU/mL]<br>IOG+CSS: Anti-SARS-CoV-2 IgG (COV2G) on the Atellica IM Analyzer (Siemens Healthineers, Erlangen, Germany) [cut-off positivity $\geq 1$ U/mL]                    |
| 25 | T0: before first dose<br>T1: at the second dose<br>T2: 21 days after the second dose                                                                                                                      | Roche Elecsys Anti-SARS-CoV-2 S [cut-off positivity $\geq 0.8$ U/mL]                                                                                                                                                                           |
| 26 | T1: 3 months after the second dose                                                                                                                                                                        | Roche Elecsys Anti-SARS-CoV-2 [cut-off positivity $\geq 0.8$ U/mL]                                                                                                                                                                             |
| 27 | T0: before first dose<br>T1: at the second dose<br>T2: 2 weeks after the second dose                                                                                                                      | SARS-CoV-2 IgG II Quant (AdviseDx, ARCHITECT® Abbott Diagnostics, Chicago, IL, USA) [cut-off positivity $> 7.1$ BAU/mL]                                                                                                                        |
| 28 | T0: before first dose<br>T1: 20 days after the first dose<br>T2: 20 days after the second dose<br>T3: 90 days after the second dose                                                                       | Cell-titre Glo 2.0 (Promega, Wisconsin, USA) [ID50 titer $\geq 10$ as SARS-CoV-2- positive and neutralizing]                                                                                                                                   |
| 29 | T0: before first dose<br>T1: 7 days after the first dose<br>T2: 21 days after the first dose<br>T3: 31 days after the first dose<br>T4: 90 days after the second dose                                     | EUROIMMUN anti-SARS-CoV-2 QuantiVac for IgG [cut-off positivity $\geq 32.5$ BAU]                                                                                                                                                               |

|    |                                                                                                                                   |                                                                                                                                                                                       |
|----|-----------------------------------------------------------------------------------------------------------------------------------|---------------------------------------------------------------------------------------------------------------------------------------------------------------------------------------|
| 30 | T0: before first dose<br>T1: 21 days after the first dose<br>T2: 42 days after the first dose                                     | SARS-CoV-2 by ADVIA Centaur® XPT Immunoassay System (Siemens Healthcare GmbH, Munich, Germany) [cut-off positivity $\geq 1.0$ Index]                                                  |
| 31 | T1: 14 days after the first dose<br>T2: 14 days after the second dose<br>T3: 4 months after the second dose                       | Roche Elecsys Anti-SARS-CoV-2 S on Cobas e601 [cut-off positivity $\geq 0.8$ IU/mL]                                                                                                   |
| 32 | T0: before first dose<br>T1: at the second dose<br>T2: 2-3 weeks days after the second dose                                       | IgG-RBD-S by Quant assay (Abbott, Ireland) [cut-off positivity $\geq 50$ AU/mL]                                                                                                       |
| 33 | T1: 28 days after the second dose                                                                                                 | Roche Elecsys Anti-SARS-CoV-2 S [cut-off positivity $\geq 0.8$ IU/mL(*)]                                                                                                              |
| 34 | T1: 3 weeks after the second dose                                                                                                 | SARS-CoV-2 S-RBD IgG by Maglumi 800 analyzer (Snibe Diagnostic, Shenzhen, China) [cut-off positivity $\geq 1.1$ AU/mL]                                                                |
| 35 | T1: 21 days after the first dose                                                                                                  | Liaison SARS-CoV-2 S1/S2 IgG (DiaSorin, Saluggia, VC, Italy) [cut-off positivity $\geq 15$ AU/mL (*)]                                                                                 |
| 36 | T0: before first dose<br>T1: at the second dose<br>T2: 2 weeks after the second dose                                              | SARS-CoV-2 IgG II Quant (AdviseDx, ARCHITECT® Abbott Diagnostics, Chicago, IL, USA) [cut-off positivity $> 50$ AU/mL]                                                                 |
| 37 | T0: before first dose<br>T1: 21 days after the first dose<br>T2: 30 days after the second dose                                    | Roche Elecsys Anti-SARS-CoV-2S on Cobas e6000 [NR]                                                                                                                                    |
| 38 | T0: before first dose<br>T1: 14 days after the first dose<br>T2: 21 days after the first dose<br>T3: 7 days after the second dose | Liaison SARS-CoV-2 trimeric-S IgG (DiaSorin, Saluggia, VC, Italy) [cut-off positivity $\geq 33.8$ BAU/mL]                                                                             |
| 39 | T0: before first dose<br>T1: 7 days after the second dose                                                                         | Liaison SARS-CoV-2 S1/S2 IgG (DiaSorin, Saluggia, VC, Italy) [cut-off positivity $\geq 15$ AU/mL (*)]                                                                                 |
| 40 | T0: before first dose<br>T1: 21 days after the first dose<br>T2: 42 days after the first dose                                     | Roche Elecsys Anti-SARS-CoV-2 S on Cobas e601 [cut-off positivity $\geq 0.8$ U/mL]                                                                                                    |
| 41 | T0: before first dose<br>T1: 21 days after the first dose<br>T2: 50 days after the first dose                                     | Roche Elecsys Anti-SARS-CoV-2 S on Cobas e6000 [cut-off positivity $\geq 0.8$ U/mL]                                                                                                   |
| 42 | T0: before first dose<br>T1: 7 days after the first dose<br>T2: 21 days after the first dose<br>T3: 28 days after the first dose  | (A) Roche Elecsys Anti-SARS-CoV-2 S [cut-off positivity $\geq 0.8$ U/mL]<br>(B) Liason SARS-CoV-2 trimeric-S IgG (DiaSorin, Saluggia, VC, Italy) [cut-off positivity $\geq 13$ AU/ml] |
| 43 | T0: before first dose<br>T1: 20 days after the first dose<br>T2: 8 days after the second dose                                     | Roche Elecsys Anti-SARS-CoV-2 S on Cobas e601 [cut-off positivity $\geq 0.8$ U/mL]                                                                                                    |
| 44 | T0: before first dose<br>T1: 1-4 weeks after the second dose                                                                      | Roche Elecsys Anti-SARS-CoV-2 S [NR]                                                                                                                                                  |

|    |                                                                                                                                                                                                          |                                                                                                                                                                                          |
|----|----------------------------------------------------------------------------------------------------------------------------------------------------------------------------------------------------------|------------------------------------------------------------------------------------------------------------------------------------------------------------------------------------------|
| 45 | T0: pre-vaccination sample **<br>T1: 12 days after the first dose<br>T2: 28 days after the first dose                                                                                                    | (A) anti SARS-CoV-2 S-RBD IgG Ab on Maglumi 2000 plus [cut-off positivity $\geq 1$ kAU/L]<br>(B) Roche Elecsys Anti-SARS-CoV-2S Ab on Cobas C-8000 [cut-off positivity $\geq 0.8$ IU/mL] |
| 46 | T0: before first dose<br>T1: at the second dose<br>T1A: 38 days after first dose<br>T2: 2-3 weeks days after the second dose                                                                             | IgG-RBD-S by Quant assay (Abbott, Ireland) [cut-off positivity $\geq 50$ AU/mL] (*)                                                                                                      |
| 47 | T1: before the second dose<br>T2: 7-10 days after the second dose                                                                                                                                        | Roche Elecsys Anti-SARS-CoV-2 S on Cobas e602 [cut-off positivity $\geq 0.8$ U/mL]                                                                                                       |
| 48 | T0: before first dose<br>T1: 7 days after the first dose<br>T2: 14 days after the first dose<br>T3: 21 days after the first dose<br>T4: 28 days after the first dose<br>T5: 35 days after the first dose | Roche Elecsys Anti-SARS-CoV-2 S [cut-off positivity $\geq 0.8$ U/mL]                                                                                                                     |
| 49 | T0: before first dose<br>T1: before the second dose<br>T2: 2 weeks after the second dose                                                                                                                 | SARS-CoV-2 IgG II Quant (AdviseDx, ARCHITECT® Abbott Diagnostics, Chicago, IL, USA) [cut-off positivity $\geq 50$ AU/mL]                                                                 |
| 50 | T1: 30 days after second dose<br>T2: 60 days after second dose<br>T3: 90 days after second dose<br>T4: 120 days after second dose<br>T5: 150 days after second dose<br>T6: 180 days after second dose    | anti SARS-CoV-2 S-RBD IgG on Maglumi [cut-off positivity $\geq 1$ AU/mL]                                                                                                                 |

\* derived from reference; \*\*available for a subgroup (i.e. resident staff) only; NR: Not Reported

Table S2. prevalence of antibody response induced by vaccination

| S.<br>No. | pre-vaccination                                         |                                              | before 2 <sup>nd</sup> dose |                                                              | within 1 month after 2 <sup>nd</sup> dose |                           | 1-2 months after 2 <sup>nd</sup> dose |                           | 3-6 months after 2 <sup>nd</sup> dose |                      | ≥ 6 months after 2 <sup>nd</sup> dose |                           |
|-----------|---------------------------------------------------------|----------------------------------------------|-----------------------------|--------------------------------------------------------------|-------------------------------------------|---------------------------|---------------------------------------|---------------------------|---------------------------------------|----------------------|---------------------------------------|---------------------------|
|           | COV+                                                    | COV-                                         | COV+                        | COV-                                                         | COV+                                      | COV-                      | COV+                                  | COV-                      | COV+                                  | COV-                 | COV+                                  | COV-                      |
| 7         |                                                         |                                              |                             |                                                              |                                           |                           |                                       |                           | 99.75                                 |                      | NE                                    |                           |
| 8         | 93.2                                                    | 0                                            |                             |                                                              | >98                                       |                           |                                       |                           |                                       |                      |                                       |                           |
| 9         |                                                         |                                              |                             |                                                              |                                           | >95 <sup>(*)</sup>        |                                       |                           |                                       |                      |                                       |                           |
| 10        | 31.38 <sup>(*)</sup>                                    |                                              | 85                          |                                                              | 99.27 <sup>(*)</sup>                      |                           |                                       |                           |                                       |                      |                                       |                           |
| 11        |                                                         |                                              | 99.7                        |                                                              |                                           | 99.8                      |                                       |                           |                                       |                      |                                       |                           |
| 12        | 100 <sup>(*)</sup>                                      | <1 <sup>(*)</sup>                            | 100 <sup>(*)</sup>          | 88 <sup>(*)</sup>                                            | 100 <sup>(*)</sup>                        | 100 <sup>(*)</sup>        |                                       |                           |                                       |                      |                                       |                           |
| 13        |                                                         |                                              |                             |                                                              | 100                                       | ~ 95 <sup>(*)</sup>       | 100                                   | ~ 95 <sup>(*)</sup>       | 100                                   | 68-95 <sup>(*)</sup> |                                       |                           |
| 14        | (A. B) 50 <sup>(*)</sup>                                | (A) ~6 <sup>(*)</sup> ; (B) 0 <sup>(*)</sup> | (A. B) 100 <sup>(*)</sup>   | (A. B) ≥75 <sup>(*)</sup>                                    | (A. B) 100 <sup>(*)</sup>                 | (A. B) 100 <sup>(*)</sup> |                                       |                           |                                       |                      | (A. B) 100 <sup>(*)</sup>             | (A, B) 100 <sup>(*)</sup> |
| 15        |                                                         |                                              |                             |                                                              |                                           |                           |                                       |                           |                                       |                      | 100                                   |                           |
| 16        |                                                         |                                              |                             |                                                              | 98.96 <sup>(*)</sup>                      |                           |                                       |                           | 99.5                                  |                      |                                       |                           |
| 17        |                                                         |                                              |                             |                                                              | 99.9                                      |                           |                                       |                           | 99.6                                  |                      |                                       |                           |
| 18        | (A,B,C) < 2 <sup>(*)</sup>                              |                                              | (A.B.C) >50 <sup>(*)</sup>  |                                                              | (A.B. C) 100 <sup>(*)</sup>               |                           |                                       |                           |                                       |                      |                                       |                           |
| 19        | NR                                                      | NR                                           | 100                         | 100                                                          | 100 <sup>(*)</sup>                        | 100                       |                                       |                           | 100 <sup>(*)</sup>                    | 100 <sup>(*)</sup>   |                                       |                           |
| 20        |                                                         |                                              |                             |                                                              | 99.84                                     |                           |                                       |                           |                                       |                      |                                       |                           |
| 21        |                                                         | (A. B) 0                                     |                             | 7 days: (A. B) 0<br>21 days: (A) NE, (B) > 50 <sup>(*)</sup> |                                           | (A. B) >95 <sup>(*)</sup> |                                       | (A. B) >95 <sup>(*)</sup> |                                       |                      |                                       |                           |
| 22        | NR                                                      |                                              | 82.5                        |                                                              | 30 days: 100<br>45 days: 100              |                           |                                       |                           |                                       |                      |                                       |                           |
| 23        | (A.B) 0                                                 |                                              | (A) 98.3; (B) 92.8          |                                                              | (A. B) 100                                |                           |                                       |                           |                                       |                      |                                       |                           |
| 24        | OSR 2.06 <sup>(*)</sup><br>IOG-CSS 18.42 <sup>(*)</sup> |                                              | OSR 100<br>IOG+CSS 100      | OSR 98<br>IOG-CSS 93.9                                       |                                           |                           |                                       |                           |                                       |                      |                                       |                           |
| 25        | 100 <sup>(*)</sup>                                      | 0 <sup>(*)</sup>                             | 100                         | 96.1                                                         | 100 <sup>(*)</sup>                        | 100                       |                                       |                           |                                       |                      |                                       |                           |
| 26        |                                                         |                                              |                             |                                                              |                                           |                           |                                       |                           |                                       | 99.33                |                                       |                           |
| 27        | 100 <sup>(*)</sup>                                      | NR                                           | 100 <sup>(*)</sup>          | 100 <sup>(*)</sup>                                           | NR                                        | 100 <sup>(*)</sup>        |                                       |                           |                                       |                      |                                       |                           |
| 28        | 78.3 <sup>(*)</sup>                                     | 0 <sup>(*)</sup>                             | 100                         | 46.15 <sup>(*)</sup>                                         | 100                                       | 100                       | 100                                   | 92.3                      |                                       |                      |                                       |                           |
| 29        | 97.3                                                    | 0                                            | 7 days: 100<br>21 days: 100 | 7 days: 40.8<br>21 days: 94.7                                | 100                                       | 100                       | 100                                   | 99.6                      |                                       |                      |                                       |                           |
| 30        |                                                         | NE                                           |                             | 100 <sup>(*)</sup>                                           |                                           | 100 <sup>(*)</sup>        |                                       |                           |                                       |                      |                                       |                           |
| 31        |                                                         |                                              | NR                          |                                                              |                                           | 99                        |                                       |                           |                                       | >95 <sup>(*)</sup>   |                                       |                           |
| 32        | (A. B. C. D) 15.1                                       |                                              | (A.B.C) > 95                | (D) ≥ 75 <sup>(*)</sup>                                      | (A.B.C)100 <sup>(*)</sup>                 | (D) 100 <sup>(*)</sup>    |                                       |                           |                                       |                      |                                       |                           |
| 33        |                                                         |                                              |                             |                                                              | 99.83                                     |                           |                                       |                           |                                       |                      |                                       |                           |
| 34        |                                                         |                                              |                             |                                                              | 99.88                                     |                           |                                       |                           |                                       |                      |                                       |                           |
| 35        |                                                         |                                              |                             | 98                                                           |                                           |                           |                                       |                           |                                       |                      |                                       |                           |
| 36        |                                                         | NR                                           |                             |                                                              |                                           | 100 <sup>(*)</sup>        |                                       |                           |                                       |                      |                                       |                           |

|    |                           |                          |                                       |                                                                                    |                           |                           |                     |  |                                        |  |                     |  |
|----|---------------------------|--------------------------|---------------------------------------|------------------------------------------------------------------------------------|---------------------------|---------------------------|---------------------|--|----------------------------------------|--|---------------------|--|
| 37 | ≥75 <sup>(*)</sup>        | 0 <sup>(*)</sup>         | 100 <sup>(*)</sup>                    | 99.4                                                                               | 100 <sup>(*)</sup>        | 100 <sup>(*)</sup>        |                     |  |                                        |  |                     |  |
| 38 |                           | NE                       |                                       | 14, 21 days: NE                                                                    |                           | ND                        |                     |  |                                        |  |                     |  |
| 39 |                           | NR                       |                                       |                                                                                    |                           | 99.5                      |                     |  |                                        |  |                     |  |
| 40 | NR                        |                          |                                       | 98.2                                                                               |                           | 99.92                     |                     |  |                                        |  |                     |  |
| 41 | 100                       | 0                        | 100                                   | 98.7                                                                               | 100                       | 100                       |                     |  |                                        |  |                     |  |
| 42 |                           | (A, B) 0                 |                                       | 7 days: (A) 0.20 <sup>(*)</sup><br>(B) 0.51 <sup>(*)</sup><br>21 days: (A, B) 97.5 |                           | (A, B) 99.8               |                     |  |                                        |  |                     |  |
| 43 | ≥ 75 <sup>(*)</sup>       | 0 <sup>(*)</sup>         | 100 <sup>(*)</sup>                    | ≥ 75 <sup>(*)</sup>                                                                | NR                        | ≥ 75 <sup>(*)</sup>       |                     |  |                                        |  |                     |  |
| 44 |                           | NR                       |                                       |                                                                                    |                           | ≥ 75 <sup>(*)</sup>       |                     |  |                                        |  |                     |  |
| 45 | (A, B) 50                 | (A) 5.6, (B) 0           | (A, B) 100 <sup>(*)</sup>             | (A, B) ≥ 75 <sup>(*)</sup>                                                         | (A, B) 100 <sup>(*)</sup> | (A, B) 100 <sup>(*)</sup> |                     |  |                                        |  |                     |  |
| 46 | (B, C) 88 <sup>(**)</sup> | (A, D) 0 <sup>(**)</sup> | (A) 100<br>(B, C) 100 <sup>(**)</sup> | (D) 98                                                                             | (A, B, C) 100             | (D) 100                   |                     |  |                                        |  |                     |  |
| 47 |                           |                          | 100 <sup>(*)</sup>                    | 100 <sup>(*)</sup>                                                                 | 100 <sup>(*)</sup>        | 100 <sup>(*)</sup>        |                     |  |                                        |  |                     |  |
| 48 |                           | 0                        |                                       | 7 days: 0<br>14,21 days: 100                                                       |                           | 28, 35 days: 100          |                     |  |                                        |  |                     |  |
| 49 |                           | ~ 0 <sup>(*)</sup>       |                                       | 100                                                                                |                           | 100                       |                     |  |                                        |  |                     |  |
| 50 |                           |                          |                                       |                                                                                    | ≥ 75 <sup>(*)</sup>       |                           | ≥ 75 <sup>(*)</sup> |  | 90, 120, 150 days: ≥ 75 <sup>(*)</sup> |  | ≥ 75 <sup>(*)</sup> |  |

(\*) estimated from tables/figures data; NR: not reported; NE: not estimable; (a) on 35 residents only

**Figure S1.** Radar plot showing the prevalence of antibody response induced by vaccination.

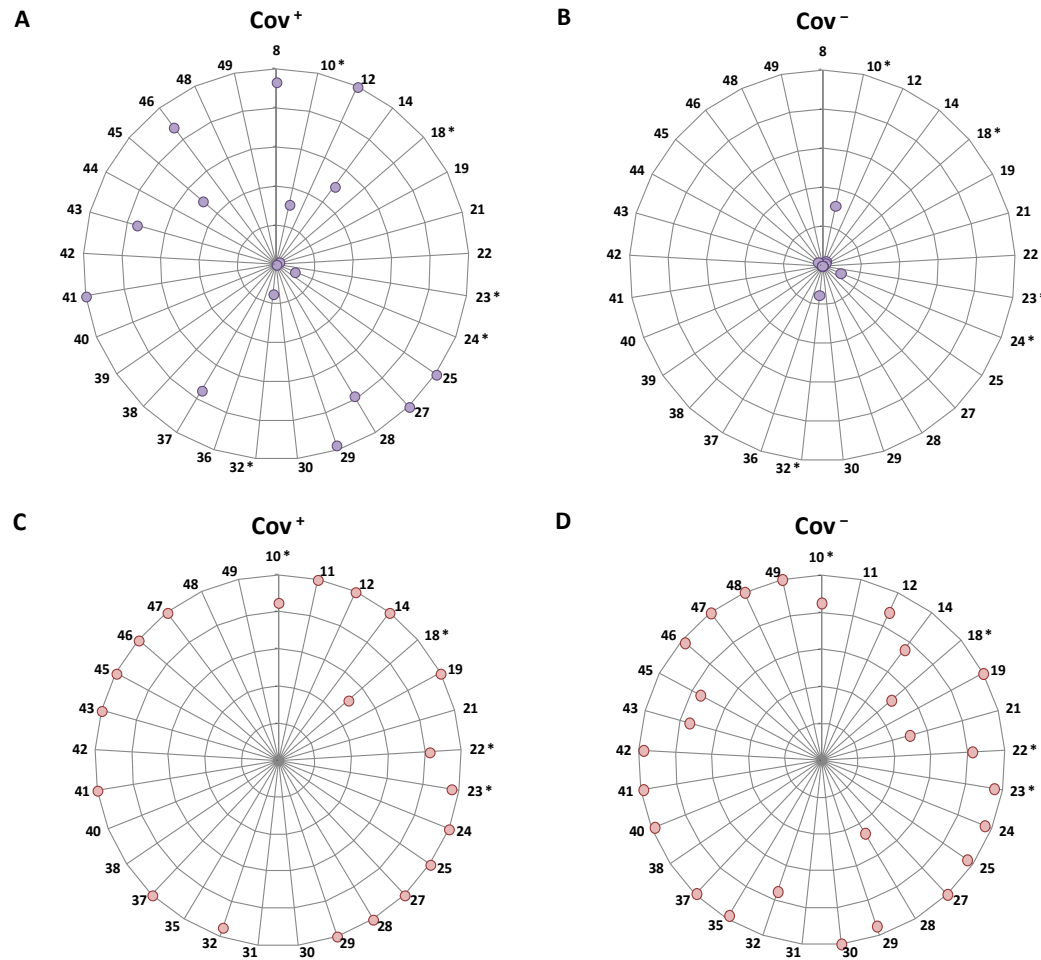

**Figure S1.** Radar plot depicting the seroconversion rates. Each colored dot represent the level of antibody response in the corresponding study included in the literature review on a 0%-100% scale (with 20% point increment). Each level of the radar represent a percentage level, from 0% (i.e center of the radar) to the outermost one (i.e. 100%); the further away from the center, higher is the observed HCW seroconversion rate. Panel A and B reports the antibody response at baseline, whereas Panel C and D those at the second dose. On the left part are reported the rate in previously infected HCWs (COV+) and on the right side those of the naive ones (COV-). Studies for which data were reported for COV+ and COV- subjects without any separation are identified by an asterisk(\*); the colors of the dots are the same of that used in Table S2 to highlight the different timepoints (purple: pre-vaccination antibody assessment ; red: antibody assessment before 2<sup>nd</sup> dose)

Figure S2. Distribution of the anti-S-RBD antibody titer at T1 according to the number of co-morbidities.

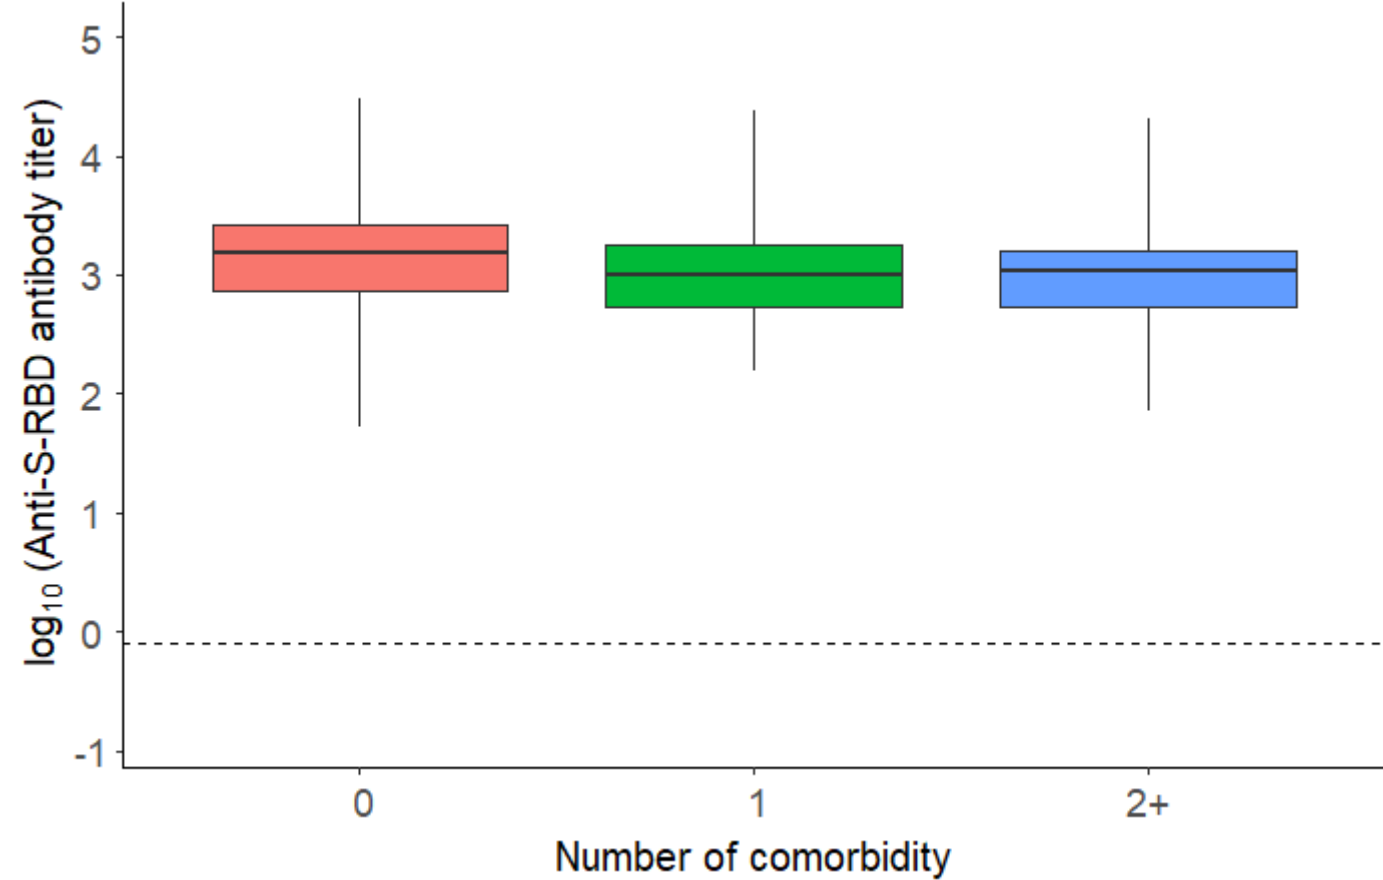

Figure S3. Percentage changes of the antibody levels between T1 and T2.

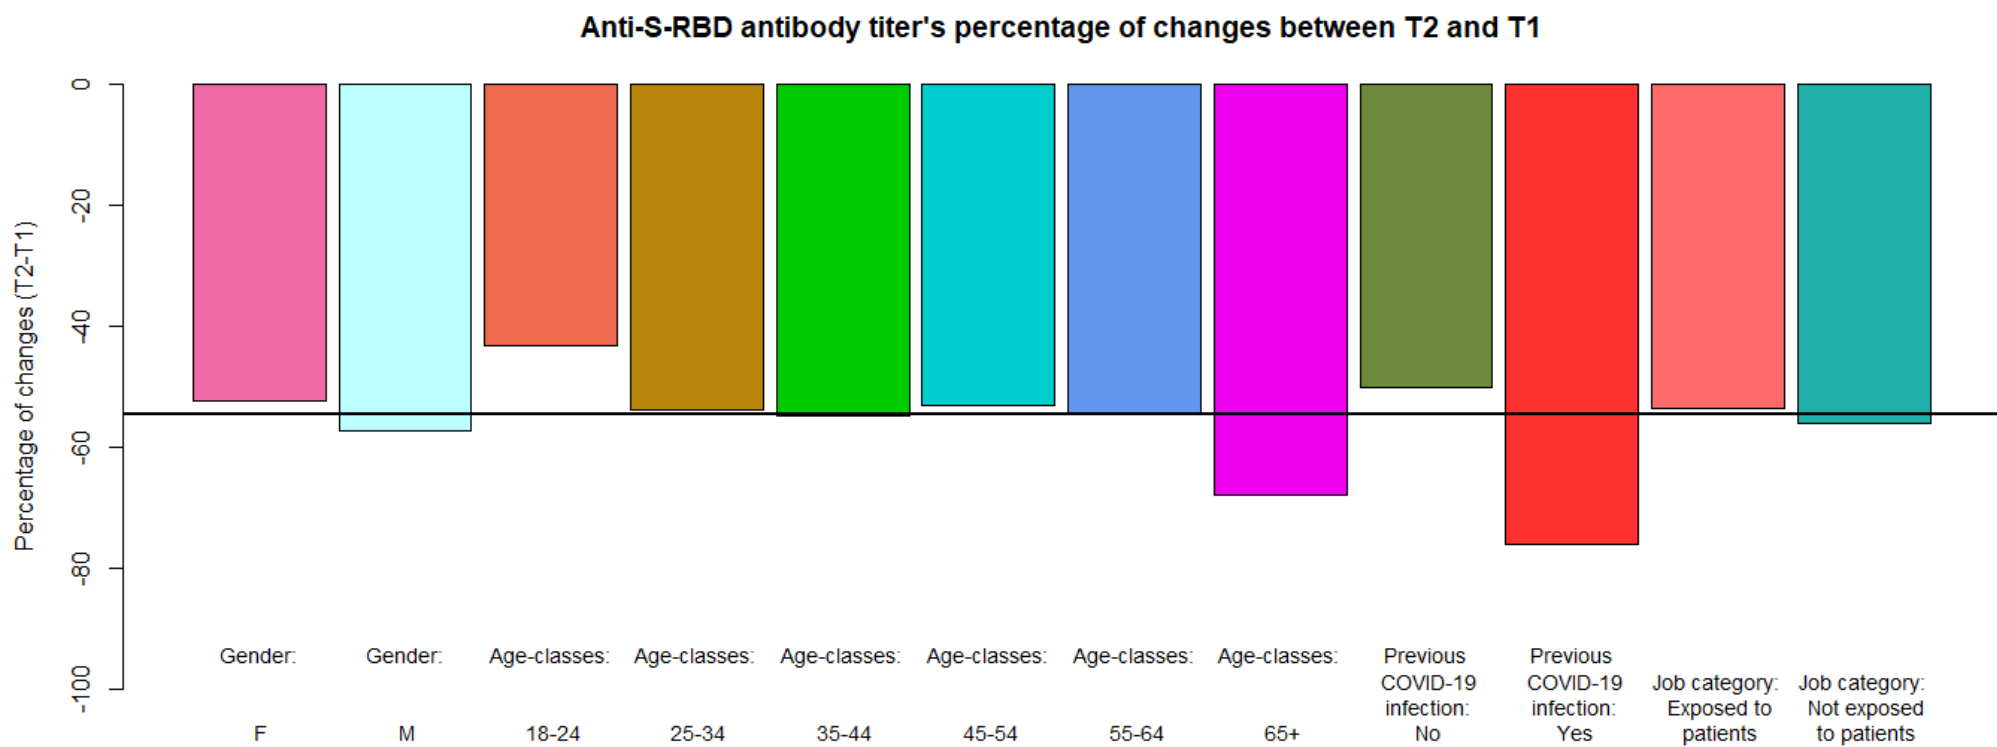

Supplement: s1 [file s1]
